# Supplementary material
Source: Springer Nature journal article supplement (https://www.springermedizin.de/resource/supplementary/12880_2008_68_MOESM5_ESM.pdf/9450470)

Caudal

Epicenter

Rostral

Day 1

 $K_{p-sc}$   
(1/min)

0.15

0.075

0.0

Day 3

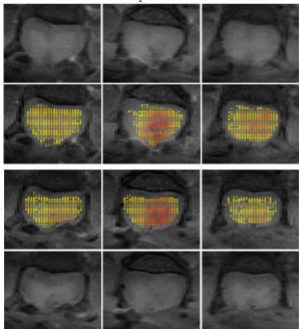

Supplement: MOESM5 [file 9450470]
